# Supplementary material for: Plasma Lipoprotein-associated Phospholipase A2 and Superoxide Dismutase are Independent Predicators of Cognitive Impairment in Cerebral Small Vessel Disease Patients: Diagnosis and Assessment
Source: PubMed Central journal article supplement (PMC6675532; doi:10.14336/ad.2019.0304), 2019-08-01
Supplement: AD-10-4-834-s.pdf [file AD-10-4-834-s.pdf]

## **Plasma Lipoprotein-associated Phospholipase A2 and Superoxide Dismutase are Independent Predictors of Cognitive Impairment in Cerebral Small Vessel Disease Patients: Diagnosis and Assessment**

**Shuzhen Zhu<sup>1,#</sup>, Xiaobo Wei<sup>1,#</sup>, Xiaohua Yang<sup>1,#</sup>, Zifeng Huang<sup>1,#</sup>, Zihan Chang<sup>1</sup>, Fen Xie<sup>1</sup>, Qin Yang<sup>1</sup>, Changhai Ding<sup>2,3</sup>, Wei Xiang<sup>4</sup>, Hongjun Yang<sup>4</sup>, Ying Xia<sup>5</sup>, Zhong-Ping Feng<sup>6</sup>, Hong-Shuo Sun<sup>6,7</sup>, Midori A. Yenari<sup>8</sup>, Lin Shi<sup>9,10</sup>, Vincent CT Mok<sup>11,\*</sup>, Qing Wang<sup>1,\*</sup>**

<sup>1</sup>Department of Neurology and <sup>2</sup>Department of Orthopedics, Zhujiang Hospital of Southern Medical University, Guangdong, China. <sup>3</sup>Menzies Institute for Medical Research, University of Tasmania, Hobart, Australia. <sup>4</sup>Department of Neurology, Guangzhou General Hospital of Guangzhou Military Command, Guangdong, China. <sup>5</sup>Shanghai Key Laboratory of Acupuncture Mechanism and Acupoint Function, Fudan University, Shanghai, China. <sup>6</sup>Department of Physiology and <sup>7</sup>Department of Surgery, Faculty of Medicine, University of Toronto, Toronto, Ontario M5S 1A8, Canada. <sup>8</sup>Department of Neurology, University of California, San Francisco & the San Francisco Veterans Affairs Medical Center, San Francisco, USA. <sup>9</sup>Department of Imaging and Interventional Radiology, The Chinese University of Hong Kong, Hong Kong, China. <sup>10</sup>BrainNow Research Institute, Shenzhen, China. <sup>11</sup>Gerald Choa Neuroscience Centre, Department of Medicine and Therapeutics, Faculty of Medicine, Prince of Wales Hospital, The Chinese University of Hong Kong, Hong Kong, China.

# SUPPLEMENTARY DATA

**Supplementary Table 1.** Linear correlation of Lp-PLA2/SOD with MMSE scores.

| Variable       | Multivariable * |          |
|----------------|-----------------|----------|
|                | $\beta$         | p value  |
| Lp-PLA2        | 0.291           | 0.002**  |
| SOD            | 0.344           | 0.000*** |
| Education      | 0.231           | 0.012*   |
| Age            | -0.147          | 0.115    |
| BMI            | 0.036           | 0.688    |
| Gender         | -0.138          | 0.121    |
| Cholesterol    | 0.061           | 0.516    |
| HDL-C          | -0.065          | 0.470    |
| LDL-C          | -0.011          | 0.904    |
| Urea           | -0.100          | 0.904    |
| Cr             | -0.122          | 0.177    |
| UA             | -0.002          | 0.982    |
| Hypertension   | 0.062           | 0.481    |
| Diabetes       | 0.009           | 0.917    |
| CHD            | -0.005          | 0.957    |
| Statin         | 0.104           | 0.231    |
| Antithrombotic | 0.160           | 0.064    |
| APOE4          | -0.024          | 0.786    |

Multiple linear regression models with backwards elimination showed a positive linear correlation between Lp-PLA2/SOD and MMSE scores after adjusting for confounders as showed in the table. Dependent variables: MMSE Scores; independent variable: Lp-PLA2 and SOD. Covariates with \* $p$ -value <0.05, \*\* $p$  <0.01, \*\*\* $p$  <0.001 are presented in bold. Abbreviations: BMI, body mass index; CHD, coronary heart disease; HDL-C, High-density lipoprotein cholesterol; LDL-C, low-density lipoprotein cholesterol; Cr, creatinine; UA, uric acid; Che, Cholinesterase; APOE, apolipoprotein E.
